# Supplementary material
Source: HighWire-hosted journal article supplement (https://cmaj.ca/highwire/filestream/146579/field_highwire_adjunct_files/0/211881-res-1-at.pdf)
Supplement: 211881-res-1-at.pdf [file 211881-res-1-at.pdf]

**Supplementary Appendix 1:** Conversion of relative ratios to the World Health Organization International Standard units (BAU/mL) for plasma or serum for anti-nucleocapsid, anti-RBD, and anti-spike

| <b>Anti-nucleocapsid*</b>                                                                                           |                     |                         |        |                         |        |
|---------------------------------------------------------------------------------------------------------------------|---------------------|-------------------------|--------|-------------------------|--------|
| Dilution                                                                                                            |                     | 1                       |        | 0.00625                 |        |
| Relative Ratio (RR)                                                                                                 | $\log_2(\text{RR})$ | $\log_2(\text{BAU/mL})$ | BAU/mL | $\log_2(\text{BAU/mL})$ | BAU/mL |
| 2                                                                                                                   | 1.0                 | 1.06                    | 2.08   | 8.38                    | 333.98 |
| 1.13                                                                                                                | 0.17                | -0.09                   | 0.94   | 7.23                    | 149.96 |
| 1                                                                                                                   | 0.0                 | -0.34                   | 0.79   | 6.98                    | 126.34 |
| 0.5                                                                                                                 | -1.0                | -1.74                   | 0.30   | 5.58                    | 47.79  |
| 0.396                                                                                                               | -1.3                | -2.21                   | 0.22   | 5.11                    | 34.46  |
| 0.25                                                                                                                | -2.0                | -3.15                   | 0.11   | 4.18                    | 18.08  |
| 0.125                                                                                                               | -3.0                | -4.55                   | 0.04   | 2.77                    | 6.84   |
| 0.0625                                                                                                              | -4.0                | -5.95                   | 0.02   | 1.37                    | 2.59   |
| 0.03125                                                                                                             | -5.0                | -7.35                   | 0.01   | -0.03                   | 0.98   |
| * Formula: $\log_2(\text{BAU/mL @ sample dilution } d) = (\log_2(\text{RR}, 2) - 0.243) / 0.713 + \log_2(1/d, 2)$ . |                     |                         |        |                         |        |
| <b>Anti-RBD†</b>                                                                                                    |                     |                         |        |                         |        |
| Dilution                                                                                                            |                     | 1                       |        | 0.00625                 |        |
| Relative Ratio (RR)                                                                                                 | $\log_2(\text{RR})$ | $\log_2(\text{BAU/mL})$ | BAU/mL | $\log_2(\text{BAU/mL})$ | BAU/mL |
| 1.25                                                                                                                | 0.32                | 1.22                    | 2.33   | 8.54                    | 372.52 |
| 1                                                                                                                   | 0.0                 | 0.80                    | 1.74   | 8.12                    | 278.37 |
| 0.5                                                                                                                 | -1.0                | -0.51                   | 0.70   | 6.82                    | 112.63 |
| 0.25                                                                                                                | -2.0                | -1.81                   | 0.28   | 5.51                    | 45.57  |
| 0.186                                                                                                               | -2.4                | -2.37                   | 0.19   | 4.95                    | 30.97  |
| 0.125                                                                                                               | -3.0                | -3.12                   | 0.12   | 4.20                    | 18.44  |
| 0.0625                                                                                                              | -4.0                | -4.42                   | 0.05   | 2.90                    | 7.46   |
| 0.03125                                                                                                             | -5.0                | -5.73                   | 0.02   | 1.59                    | 3.02   |
| 0.01563                                                                                                             | -6.0                | -7.03                   | 0.01   | 0.29                    | 1.22   |
| †Formula: $\log_2(\text{BAU/mL @ sample dilution } d) = (\log(\text{RR}, 2) + 0.612) / 0.766 + \log(1/d, 2)$ .      |                     |                         |        |                         |        |
| <b>Anti-spike‡</b>                                                                                                  |                     |                         |        |                         |        |
| Dilution                                                                                                            |                     | 1                       |        | 0.00625                 |        |
| Relative Ratio (RR)                                                                                                 | $\log_2(\text{RR})$ | $\log_2(\text{BAU/mL})$ | BAU/mL | $\log_2(\text{BAU/mL})$ | BAU/mL |
| 1.38                                                                                                                | 0.46                | -0.18                   | 0.88   | 7.14                    | 141.46 |
| 1                                                                                                                   | 0.0                 | -0.77                   | 0.59   | 6.55                    | 93.80  |
| 0.5                                                                                                                 | -1.0                | -2.05                   | 0.24   | 5.28                    | 38.75  |
| 0.25                                                                                                                | -2.0                | -3.32                   | 0.10   | 4.00                    | 16.01  |
| 0.19                                                                                                                | -2.4                | -3.83                   | 0.07   | 3.50                    | 11.28  |
| 0.125                                                                                                               | -3.0                | -4.60                   | 0.04   | 2.72                    | 6.61   |
| 0.0625                                                                                                              | -4.0                | -5.87                   | 0.02   | 1.45                    | 2.73   |
| 0.03125                                                                                                             | -5.0                | -7.15                   | 0.01   | 0.17                    | 1.13   |
| 0.01563                                                                                                             | -6.0                | -8.42                   | 0.00   | -1.10                   | 0.47   |
| ‡Formula: $\log_2(\text{BAU/mL @ sample dilution } d) = (\log(\text{RR}, 2) - 0.604) / 0.784 + \log(1/d, 2)$ .      |                     |                         |        |                         |        |
